# Supplementary material for: Novel Characteristics of Mitochondrial Electron Transport Chain from Eimeria tenella
Source: PubMed Central journal article supplement (PMC6356742; doi:10.3390/genes10010029), 2019-01-08
Supplement: genes-10-00029-s001.pdf [file genes-10-00029-s001.pdf]

**Table S1.** Nano-LC MS/MS analysis of SDH activity stained band from HrCNE.

|    | Protein                                                                                           | MW      | Score | Peptide | Coverage | Accession | Note*               |
|----|---------------------------------------------------------------------------------------------------|---------|-------|---------|----------|-----------|---------------------|
| 1  | Microneme protein Etmic-1                                                                         | 74,778  | 993   | 33      | 41       | O43981    | <i>gi/2707733</i>   |
| 2  | Microneme protein 3                                                                               | 105,644 | 555   | 18      | 23       | B6VCV4    | <i>gi/211905276</i> |
| 3  | Mitochondrial-processing<br>peptidase beta subunit, putative                                      | 57,496  | 389   | 22      | 52       | U6KT33    | <i>gi/557144991</i> |
| 4  | Mitochondrial-processing<br>peptidase alpha subunit, putative                                     | 62,775  | 311   | 16      | 30       | U6KH88    | <i>gi/557137520</i> |
| 5  | Microneme protein Etmic-2<br>Microneme protein-2                                                  | 35,087  | 281   | 11      | 42       | U6KXC3    | <i>gi/4164596</i>   |
| 6  | Ubiquinol-cytochrome <i>c</i><br>reductase domain-containing<br>protein, putative (Fe2S2 subunit) | 43,429  | 215   | 8       | 32       | U6KR99    | <i>gi/557141998</i> |
| 7  | Putative rhoptry neck protein                                                                     | 232,935 | 196   | 9       | 5        | A7DZP6    | <i>gi/153581935</i> |
| 8  | Ubiquinol-cytochrome <i>c</i><br>reductase complex 14 kDa<br>protein, putative                    | 25,480  | 158   | 6       | 23       | U6KKV7    | <i>gi/557139144</i> |
| 9  | Uncharacterized protein (one<br>transmembrane region)                                             | 23,144  | 147   | 4       | 31       | U6KQV1    | <i>gi/557139998</i> |
| 10 | Uncharacterized protein                                                                           | 33,398  | 140   | 9       | 36       | U6KXU8    | <i>gi/557147873</i> |
| 11 | Cytochrome <i>c</i> oxidase subunit Vb                                                            | 25,120  | 133   | 36      | 38       | C8TDR9    | <i>gi/118490698</i> |
| 12 | Cytochrome <i>c</i> 1, putative                                                                   | 46,055  | 116   | 4       | 14       | U6L5K5    | <i>gi/557147988</i> |

|    |                                                                              |         |    |   |    |        |                     |
|----|------------------------------------------------------------------------------|---------|----|---|----|--------|---------------------|
| 13 | Nucleoside-triphosphatase, putative                                          | 100,043 | 91 | 2 | 3  | U6KZA4 | <i>gi/557148408</i> |
| 14 | Uncharacterized protein (3 transmembrane region) [ <i>Eimeria necatrix</i> ] | 27,173  | 88 | 5 | 16 | U6N036 | <i>gi/557233254</i> |
| 15 | Transhydrogenase                                                             | 108,380 | 88 | 3 | 3  | Q07600 | <i>gi/305062</i>    |
| 16 | Superoxide dismutase                                                         | 24,925  | 87 | 6 | 37 | U6KZ13 | <i>gi/557146360</i> |
| 17 | Sporozoite antigen                                                           | 22,369  | 86 | 2 | 12 | P15744 | <i>gi/113933</i>    |
| 18 | Uncharacterized protein (one transmembrane region)                           | 15,581  | 80 | 2 | 15 | U6KIX2 | <i>gi/557138220</i> |
| 19 | Uncharacterized protein (one transmembrane region)                           | 8,488   | 72 | 1 | 18 | U6KUQ3 | <i>gi/557146721</i> |
| 20 | Quinol Cytochrome <i>c</i> Reductase subunit 9                               | 12,113  | 64 | 3 | 36 | U6KG27 | <i>gi/557137182</i> |
| 21 | Uncharacterized protein (two transmembrane region)                           | 23,540  | 62 | 1 | 4  | U6LB54 | <i>gi/557154558</i> |
| 22 | Uncharacterized protein (Iron-sulfur cluster binding domain)                 | 13,354  | 61 | 3 | 22 | U6KZ96 | <i>gi/557146466</i> |
| 23 | Cytochrome <i>c</i> oxidase subunit II, putative                             | 22,720  | 59 | 2 | 12 | H9BA62 | <i>gi/357017687</i> |
| 24 | Cytochrome <i>c</i> oxidase IV                                               | 23,681  | 56 | 5 | 24 | H9B966 | <i>gi/357016995</i> |

|    |                                                                                          |        |    |   |    |        |                     |
|----|------------------------------------------------------------------------------------------|--------|----|---|----|--------|---------------------|
| 25 | Succinate dehydrogenase<br>(Ubiquinone) flavoprotein<br>subunit, mitochondrial, putative | 71,427 | 55 | 1 | 2  | U6KGY0 | <i>gi/557137402</i> |
| 26 | Cytochrome c oxidase subunit 2                                                           | 23,918 | 54 | 4 | 18 | H9B9F9 | <i>gi/357017181</i> |
| 27 | Uncharacterized protein (one<br>transmembrane region)                                    | 13,843 | 52 | 4 | 50 | U6L2Z0 | <i>gi/557146997</i> |
| 28 | Zgc:110343, related<br>(peroxyredoxin)                                                   | 28,449 | 52 | 3 | 14 | U6KYA3 | <i>gi/557147835</i> |

Yellow, orange and green cells are identified peptides related to complex II, III and IV, respectively.

Figure S1

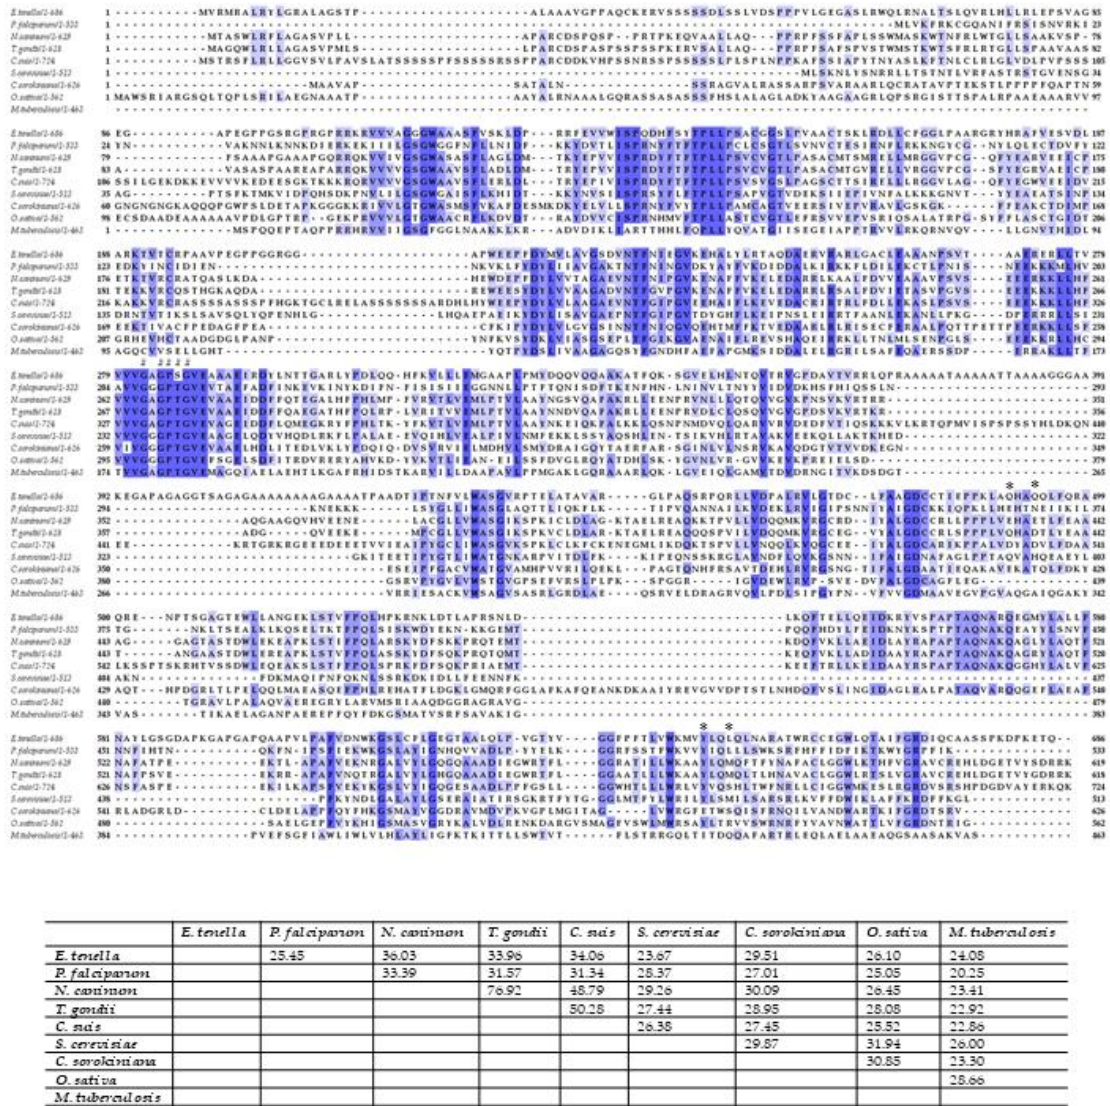

Figure S1. Top: sequence alignment of amino acid sequences of NDH2 from *E. tenella* and other organisms. Residues were colored according to percentage identity by Jalview. The conserved GXGXXG motifs as potential NADH-binding residues and the ubiquinone binding residues according to the crystal structure of *S. cerevisiae* Ndi1 (PDB: 5YJW) are shown with “#” and “\*” symbols, respectively. Bottom: Amino acid sequence identity. Abbreviations; *E. tenella*: *Eimeria tenella* (XP\_013228441), *P. falciparum*: *Plasmodium falciparum* (XP\_001352022), *N. caninum*: *Neospora caninum* (XP\_003879906), *T. gondii*: *Toxoplasma gondii* (XP\_002369675), *C. suis*: *Cystoisospora suis* (PHJ19914), *S. cerevisiae*: *Saccharomyces cerevisiae* (EDN64274), *M. tuberculosis*: *Mycobacterium tuberculosis* (L7N5D1\_MYCTO), *C. soroki*: *Chlorella sorokiniana* (PRW59413), *O. sativa*: *Oryza sativa* (XP\_015644788).

Figure S2

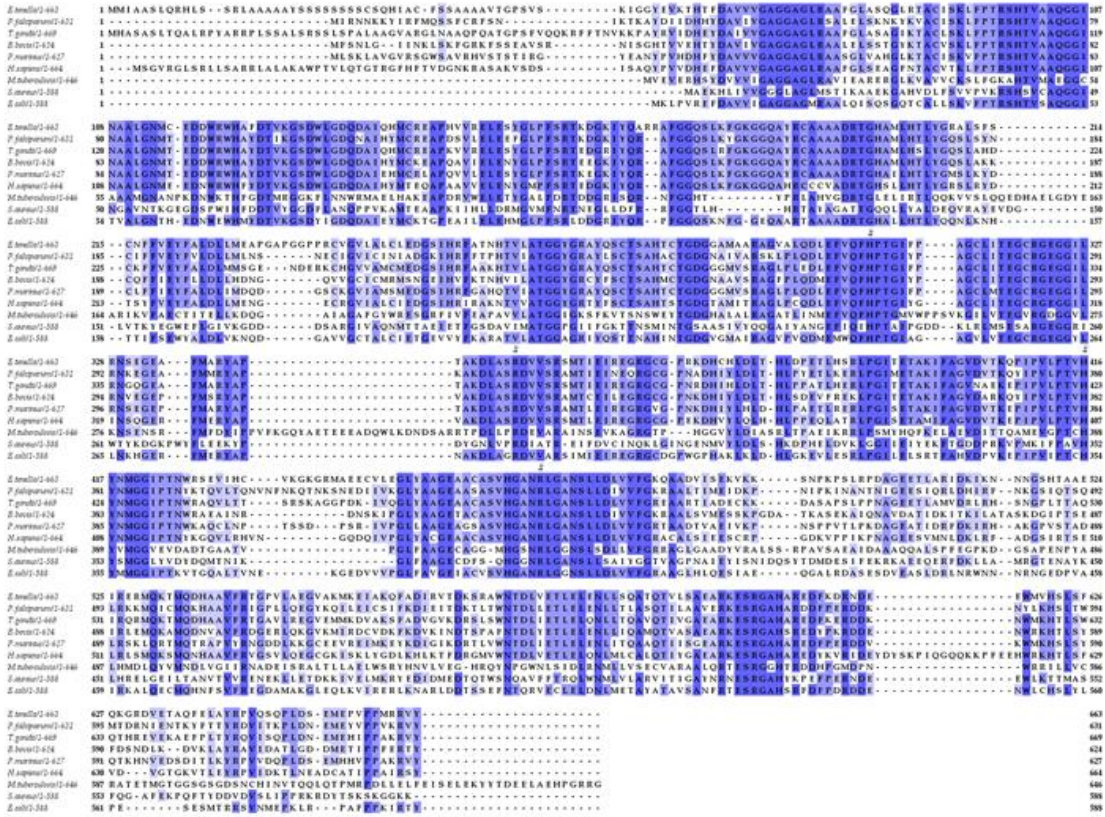

|                        | <i>E. tenella</i> | <i>P. falciparum</i> | <i>T. gondii</i> | <i>B. bovis</i> | <i>P. marinus</i> | <i>H. sapiens</i> | <i>M. tuberculosis</i> | <i>S. aureus</i> | <i>E. coli</i> |
|------------------------|-------------------|----------------------|------------------|-----------------|-------------------|-------------------|------------------------|------------------|----------------|
| <i>E. tenella</i>      | 64.59             | 71.41                | 63.83            | 68.54           | 60.56             | 31.76             | 30.58                  | 52.37            |                |
| <i>P. falciparum</i>   |                   | 66.56                | 64.47            | 67.19           | 60.09             | 30.75             | 31.94                  | 49.67            |                |
| <i>T. gondii</i>       |                   |                      | 63.54            | 70.56           | 62.19             | 31.78             | 31.16                  | 51.82            |                |
| <i>B. bovis</i>        |                   |                      |                  | 64.08           | 61.30             | 32.09             | 31.57                  | 51.41            |                |
| <i>P. marinus</i>      |                   |                      |                  |                 | 62.02             | 32.37             | 31.48                  | 52.28            |                |
| <i>H. sapiens</i>      |                   |                      |                  |                 |                   | 30.51             | 30.29                  | 51.22            |                |
| <i>M. tuberculosis</i> |                   |                      |                  |                 |                   |                   | 26.58                  | 34.02            |                |
| <i>S. aureus</i>       |                   |                      |                  |                 |                   |                   |                        | 31.33            |                |
| <i>E. coli</i>         |                   |                      |                  |                 |                   |                   |                        |                  |                |

Figure S2. Top: sequence alignment of amino acid sequences of SDH1 (flavoprotein subunit) from *E. tenella* and other organisms. Residues were colored according to percentage identity by Jalview. Conserved residues involved in the dicarboxylate-binding, according to the crystal structure of *E. coli* succinate dehydrogenase SDH (PDB: 1NEK), are shown with “#” symbol. Bottom: Amino acid sequence identity. Abbreviations; *E. tenella*: *Eimeria tenella* (XP\_013228047), *P. falciparum*: *Plasmodium falciparum* (CZT98601), *T. gondii*: *Toxoplasma gondii* (KYF42821), *B. bovis*: *Babesia bovis* (XP\_001610645), *P. marinus*: *Perkinsus marinus* (EER16513), *H. sapiens*: *Homo sapiens* (AAA20683), *M. tuberculosis*: *Mycobacterium tuberculosis* (BAX25882), *S. aureus*: *Staphylococcus aureus* (EWC66604), *E. coli*: *Escherichia coli* (KGM73400).

Figure S3

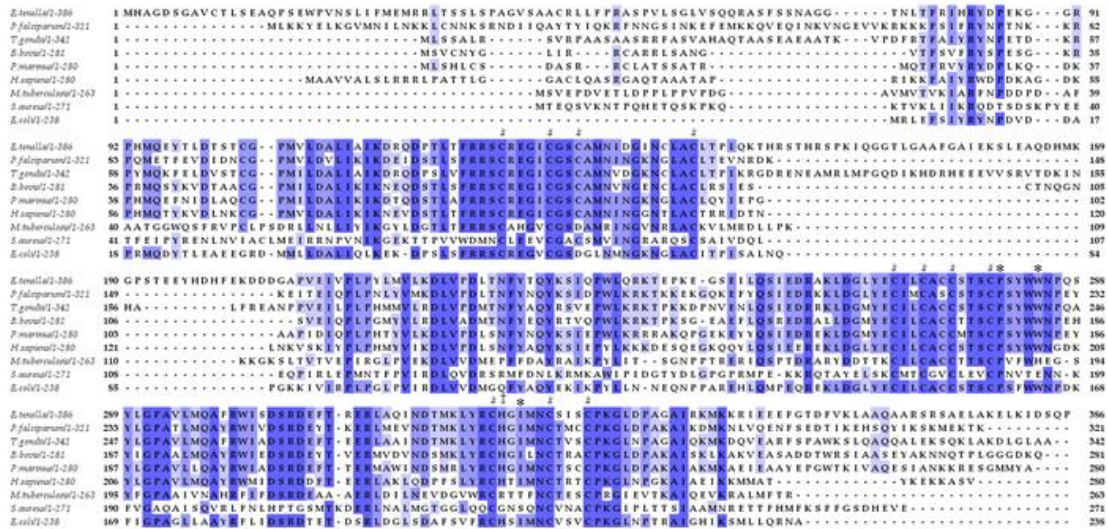

|                        | <i>E. tenella</i> | <i>P. falciparum</i> | <i>T. gondii</i> | <i>B. bovis</i> | <i>P. marinus</i> | <i>H. sapiens</i> | <i>M. tuberculosis</i> | <i>S. aureus</i> | <i>E. coli</i> |
|------------------------|-------------------|----------------------|------------------|-----------------|-------------------|-------------------|------------------------|------------------|----------------|
| <i>E. tenella</i>      |                   | 46.34                | 58.12            | 50.15           | 52.28             | 48.17             | 32.47                  | 19.64            | 42.11          |
| <i>P. falciparum</i>   |                   |                      | 50.29            | 58.70           | 59.42             | 53.19             | 34.83                  | 22.63            | 49.38          |
| <i>T. gondii</i>       |                   |                      |                  | 54.06           | 54.06             | 49.23             | 33.11                  | 19.17            | 46.57          |
| <i>B. bovis</i>        |                   |                      |                  |                 | 59.79             | 54.92             | 36.40                  | 19.42            | 48.54          |
| <i>P. marinus</i>      |                   |                      |                  |                 |                   | 62.26             | 34.59                  | 20.44            | 49.17          |
| <i>H. sapiens</i>      |                   |                      |                  |                 |                   |                   | 35.58                  | 23.51            | 58.11          |
| <i>M. tuberculosis</i> |                   |                      |                  |                 |                   |                   |                        | 23.68            | 41.39          |
| <i>S. aureus</i>       |                   |                      |                  |                 |                   |                   |                        |                  | 24.39          |
| <i>E. coli</i>         |                   |                      |                  |                 |                   |                   |                        |                  |                |

Figure S3. Top: sequence alignment of amino acid sequences of SDH2 (iron-sulfur cluster subunit) from *E. tenella* and other organisms. Residues were colored according to percentage identity by Jalview. Conserved residues involved in the coordination of the iron-sulfur clusters, and interactions with cytochrome *b* and ubiquinone, according to the crystal structure of *E. coli* succinate dehydrogenase SDH (PDB: 1NEK), are shown with “#”, “†” and “\*” symbols, respectively. Bottom: Amino acid sequence identity. Abbreviations; *E. tenella*: *Eimeria tenella* (XP\_013233141), *P. falciparum*: *Plasmodium falciparum* (CZT99291), *T. gondii*: *Toxoplasma gondii* (CEL77101), *B. bovis*: *Babesia bovis* (EDO06889), *P. marinus*: *Perkinsus marinus* (EEQ98108), *H. sapiens*: *Homo sapiens* (AAA81167), *M. tuberculosis*: *Mycobacterium tuberculosis* (KLL09309), *S. aureus*: *Staphylococcus aureus* (AKJ17007), *E. coli*: *Escherichia coli* (KIH34397).

Figure S4

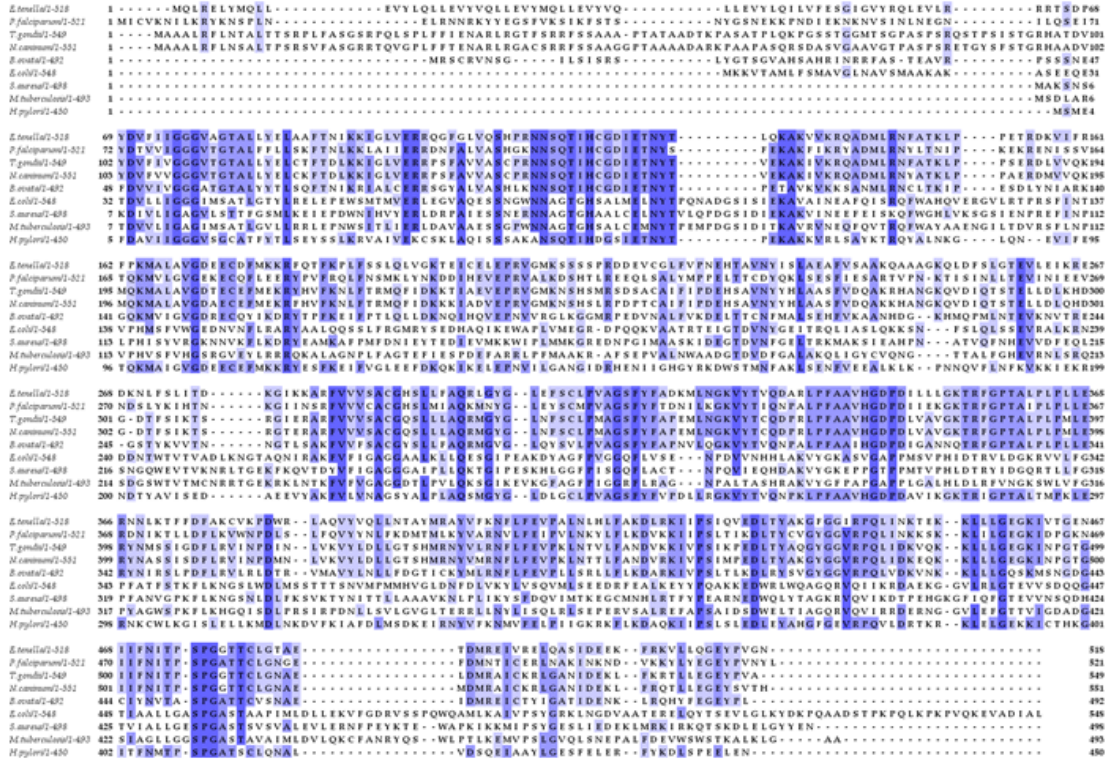

|                        | <i>E. tenella</i> | <i>P. falciparum</i> | <i>T. gondii</i> | <i>N. caninum</i> | <i>B. ovata</i> | <i>E. coli</i> | <i>S. aureus</i> | <i>M. tuberculosis</i> | <i>H. pylori</i> |
|------------------------|-------------------|----------------------|------------------|-------------------|-----------------|----------------|------------------|------------------------|------------------|
| <i>E. tenella</i>      | 48.85             |                      | 59.19            | 58.38             | 48.89           | 20.04          | 20.16            | 22.79                  | 42.95            |
| <i>P. falciparum</i>   |                   |                      | 50.38            | 49.52             | 50.91           | 21.55          | 21.60            | 22.81                  | 42.73            |
| <i>T. gondii</i>       |                   |                      |                  | 87.64             | 49.80           | 22.54          | 21.27            | 23.87                  | 42.73            |
| <i>N. caninum</i>      |                   |                      |                  |                   | 49.80           | 19.65          | 20.45            | 24.80                  | 42.51            |
| <i>B. ovata</i>        |                   |                      |                  |                   |                 | 22.61          | 22.13            | 23.55                  | 44.25            |
| <i>E. coli</i>         |                   |                      |                  |                   |                 |                | 45.40            | 47.78                  | 22.84            |
| <i>S. aureus</i>       |                   |                      |                  |                   |                 |                |                  | 41.53                  | 21.81            |
| <i>M. tuberculosis</i> |                   |                      |                  |                   |                 |                |                  |                        | 22.29            |
| <i>H. pylori</i>       |                   |                      |                  |                   |                 |                |                  |                        |                  |

Figure S4. Top: sequence alignment of amino acid sequences of MQO from *E. tenella* and other organisms. Residues were colored according to percentage identity by Jalview. Bottom: Amino acid sequence identity. Abbreviations; *E. tenella*: *Eimeria tenella* (CAK51433), *P. falciparum*: *Plasmodium falciparum* (CAG25406), *T. gondii*: *Toxoplasma gondii* (ABE76504), *N. caninum*: *Neospora caninum* (XP\_003881055), *B. ovata*: *Babesia ovata* (GBE62760), *E. coli*: *Escherichia coli* (OAF94253), *S. aureus*: *Staphylococcus aureus* (ABR53505), *M. tuberculosis*: *Mycobacterium tuberculosis* (KXN95083), *H. pylori*: *Helicobacter pylori* (HP\_0086).

Figure S5

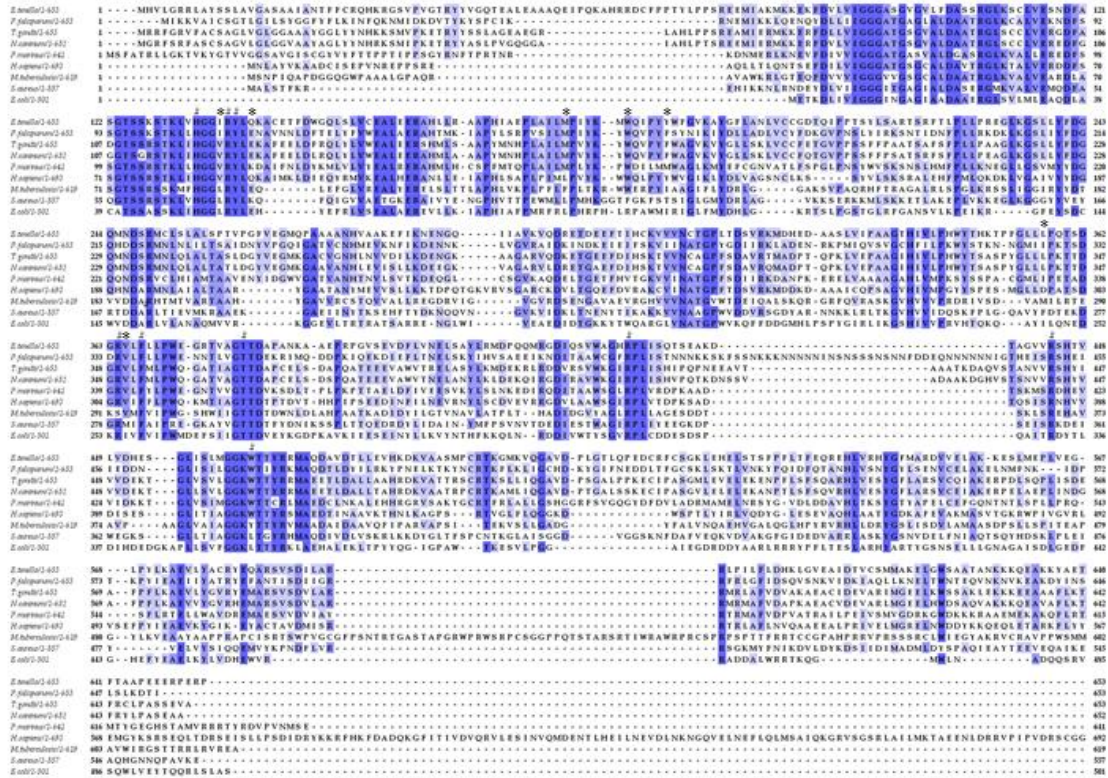

|                        | <i>E. tenella</i> | <i>P. falciparum</i> | <i>T. gondii</i> | <i>N. caninum</i> | <i>P. marinus</i> | <i>H. sapiens</i> | <i>M. tuberculosis</i> | <i>S. aureus</i> | <i>E. coli</i> |
|------------------------|-------------------|----------------------|------------------|-------------------|-------------------|-------------------|------------------------|------------------|----------------|
| <i>E. tenella</i>      |                   | 87.35                | 52.69            | 52.91             | 37.42             | 39.90             | 29.04                  | 30.22            | 28.10          |
| <i>P. falciparum</i>   |                   |                      | 40.27            | 39.85             | 35.42             | 35.20             | 25.71                  | 29.01            | 25.73          |
| <i>T. gondii</i>       |                   |                      |                  | 83.44             | 39.45             | 41.15             | 30.23                  | 28.78            | 30.74          |
| <i>N. caninum</i>      |                   |                      |                  |                   | 41.64             | 41.60             | 30.69                  | 27.60            | 28.98          |
| <i>P. marinus</i>      |                   |                      |                  |                   |                   | 40.00             | 29.66                  | 28.50            | 27.55          |
| <i>H. sapiens</i>      |                   |                      |                  |                   |                   |                   | 31.29                  | 31.26            | 29.96          |
| <i>M. tuberculosis</i> |                   |                      |                  |                   |                   |                   |                        | 30.07            | 31.01          |
| <i>S. aureus</i>       |                   |                      |                  |                   |                   |                   |                        |                  | 30.90          |
| <i>E. coli</i>         |                   |                      |                  |                   |                   |                   |                        |                  |                |

Figure S5. Top: sequence alignment of amino acid sequences of G3PDH from *E. tenella* and other organisms. Residues were colored according to percentage identity by Jalview. Conserved residues possibly involved in the binding of glycerol-3-phosphate and ubiquinone, according to the crystal structure of *E. coli* G3PDH (PDB: 2R46), are shown with “#” and “\*” symbols, respectively. Bottom: Amino acid sequence identity. Abbreviations; *E. tenella*: *Eimeria tenella* (XP\_013232618), *P. falciparum*: *Plasmodium falciparum* (PKC45437), *T. gondii*: *Toxoplasma gondii* (EPR62522), *N. caninum*: *Neospora caninum* (CEL66611), *P. marinus*: *Perkinsus marinus* (XP\_002774011), *H. sapiens*: *Homo sapiens* (XP\_011509280), *M. tuberculosis*: *Mycobacterium tuberculosis* (CKM72788), *S. aureus*: *Staphylococcus aureus* (K1121235), *E. coli*: *Escherichia coli* (WP\_021514332).



Figure S6

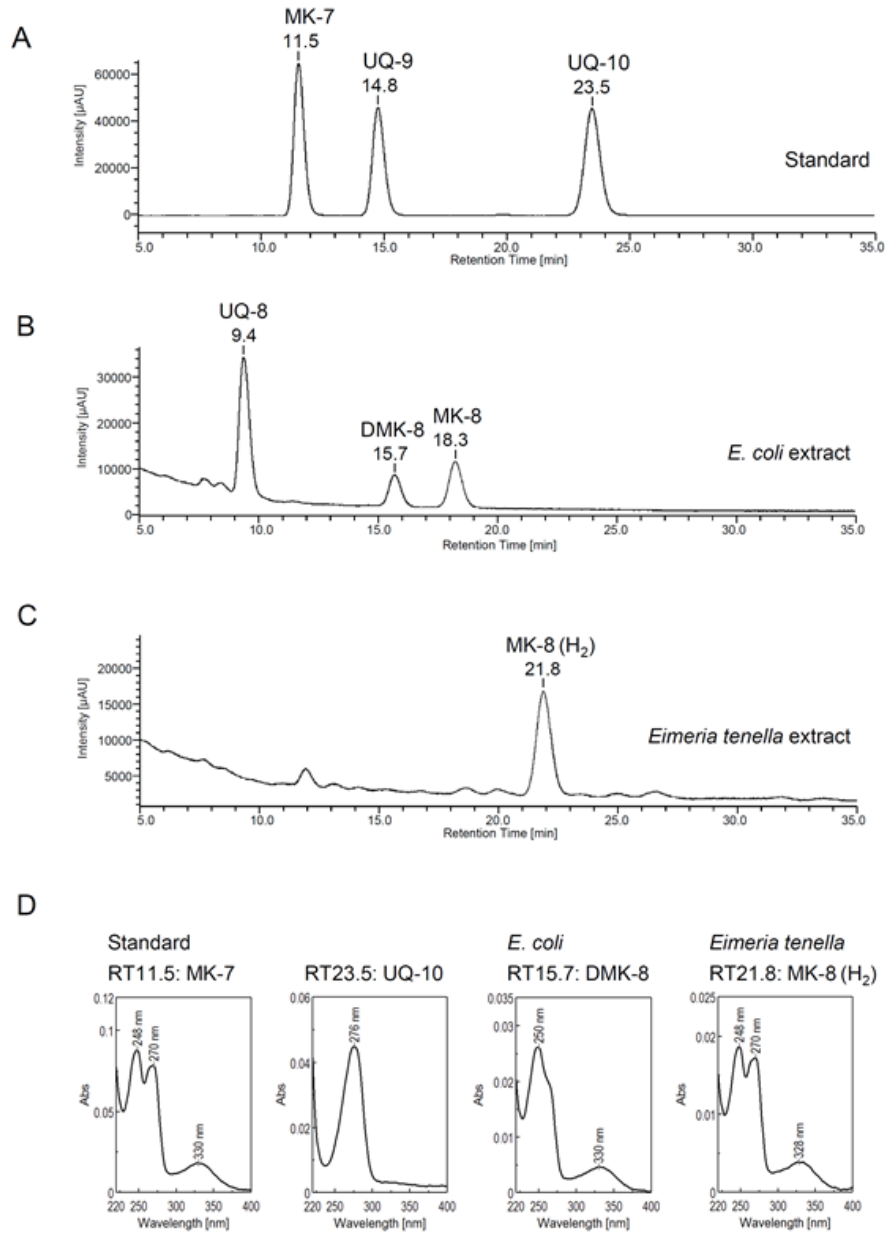

Figure S6. Quinone composition of *E. tenella* extract analysed by HPLC-PDA. **(a)**, mixture of standard quinones, MK-7, UQ-9 and UQ-10. **(b)**, *E. coli* extract containing UQ-8, DMK-8 and MK-8. **(c)**, *E. tenella* extract. **(d)**, UV-spectra of MK-7, UQ-10, DMK-8 and MK-8( $H_2$ ).

Figure S7

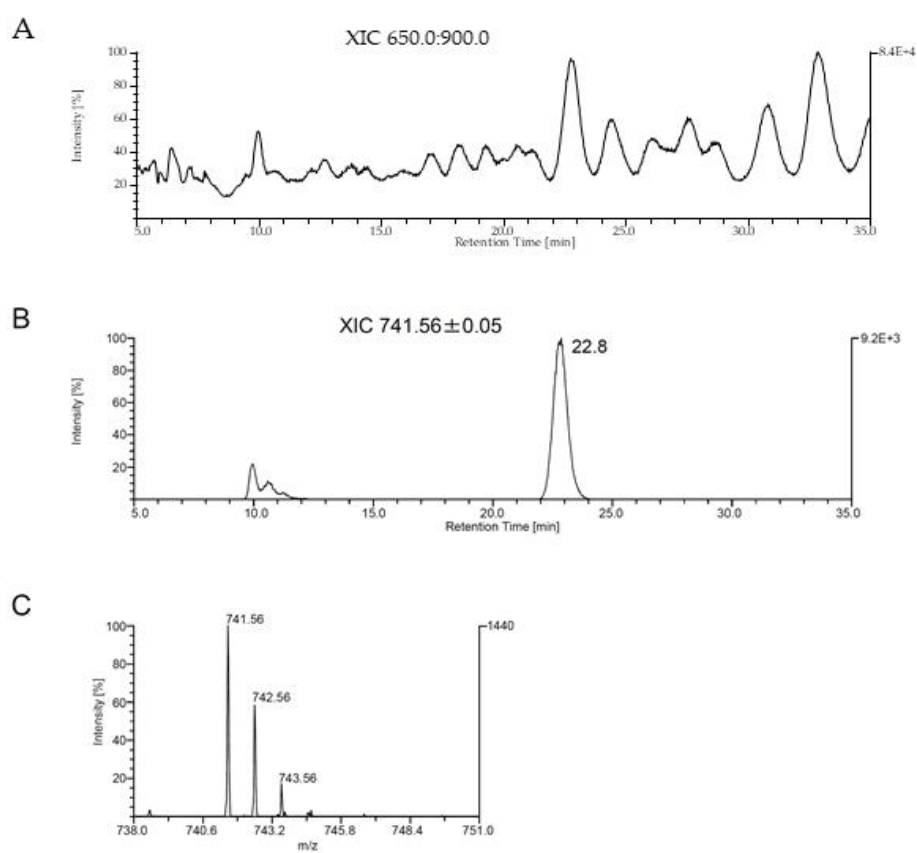

Figure S7. LC-MS analysis of *E. tenella* extract. **(a)**, extracted ion chromatogram (XIC) of m/z range 650-900. **(b)**, XIC of m/z 741.56  $\pm$  0.05 corresponding to  $[M + Na]^+$  from MK-8(H<sub>2</sub>). **(c)**, Mass spectrum of the component eluted at retention time 22.8 minutes.
